# Supplementary material
Source: Research Square preprint supplement (doi:10.21203/rs.3.rs-8800008/v1)
Supplement: Supplementary file 1 [file ca40c84351f6ee92cf2e5d54.docx]

**Supplementary Table S1.** **Humber River Health Initiatives Alignment with High Reliability Organization Principles and Safety Culture**

|  | Initiatives | Description | Sensitivity to Operations | Preoccupation with Failure | Deference to Expertise | Commitment to Resilience | Reluctance to Simplify | Reason’s Safety Culture Domain (Informed, Reporting, Just, Flexible, Learning) |
| --- | --- | --- | --- | --- | --- | --- | --- | --- |
|  | Command Centre – Generation 1 Tiles (2018) | 30+ patient flow tiles implemented, to facilitate inpatient flow and Emergency Department capacity, optimize allocation of resources in real time. | X | X |  | X |  | Informed culture, reporting culture, flexible culture |
|  | Command Centre – Generation 2 Tiles (2019)  Perinatal Tile, Clinical Deterioration, Risk of Harm Tiles, Senior Care Tile, Registered Nurses’ Association of Ontario Best Practice Spotlight Organization Tile | Tiles with special focus on identifying early signs of patient deterioration and deviation from standards of practice and trigger actions. Interventions to prevent harm, reduction of unexpected events (i.e. cardiac arrest, abnormal fetal heart rate tracing). | X | X | X | X | X | Informed culture, reporting culture |
|  | Leadership orientation to day-to-day activities (2021) | Monthly orientation for new leaders to all departments across the organization to ensure internal alignment with strategic plan and organizational workflows and accountabilities (e.g. quality, patient safety and risk management, etc.) | X | X |  | X | X | Informed culture, learning culture |
|  | Daily safety huddles, compliance reporting to the Board of Directors (2016) | Daily unit safety huddles tracked via electronic centralized database, compliance and trends monitored, data reported to board quality quarterly. | X | X | X |  |  | Informed culture, reporting culture, learning culture |
|  | Patient Safety Incident Reporting (Quality & Risk Management (QRM[[1]](#footnote-1)) system) (2015) | Incident reports completed by staff daily in the QRM system. QRM reports produced monthly and quarterly, updated to reflect patient safety incidents, published internally and shared with applicable teams and reviewed at corporate patient safety committee. | X | X | X | X |  | Reporting culture, informed culture, learning culture |
|  | Corporate Patient Safety Committee, inclusive of SMP Committee, Falls Committee, Wound Care Committee, CARC Committee, Vanessa Law, Device Recalls, Medication Recalls, IPAC Reports, Chart reviews, System reviews, RAC, Critical Incident Reviews, Never Event Reviews (2015) | Cross-program monthly committee meetings including a patient family representative reviewing key internal patient safety metrics, incidents and initiatives as well as dedicated education including cognitive bias recognition/mitigation. Review potential external organizational threats and develop mitigation strategies (i.e. supply and drug backorders). | X | X | X | X | X | Informed culture, reporting culture, learning culture, just culture |
|  | Adverse Event Reviews – Patient Safety Action Plans (based on IHI Trigger Tools) (2015) | Program chart reviews conducted for patient incidents, multi team system reviews undertaken to address identified complex intra and cross program safety issues | X | X | X | X | X | Informed culture, flexible culture, reporting culture, learning culture, just culture |
|  | Nursing staff competency testing (physical assessment and communication) (2019) | Physical head to toe assessment competency evaluation of all newly hired nursing staff. Unsuccessful staff are provided support or exited from the organization if not able to meet patient safety requirements. | X | X |  | X | X | Flexible culture, learning culture |
|  | Quality Dashboards (clinical and non-clinical) (2017) | Monthly reports produced for departments with multiple safety metrics, also available on iHumber | X | X |  |  |  | Informed culture, reporting culture, learning culture, flexible culture |
|  | RNAO Best Practice Spotlight Organization (2018) | Implementation and sustainment of best practice guidelines including embedding into hospital EMR. Development of best practice champions. Regular education and workshops for all staff to support best practices. | X | X | X |  | X | Informed culture, learning culture, reporting culture |
|  | Reinventing patient care (RPCCs) – Continuous Quality Improvement, and Patient and Family Advisory Committees (PFAC) (2018) | Engaging patient and family advisors in all care areas to promote unit-level or local changes through a lens of improving patient experience, quality and patient safety. | X | X | X |  | X | Flexible culture, learning culture |
|  | Patient and Family Advisor representation on corporate hospital committees and Board Committees (governance) (2025) | Patient and family advisor representative on the Board Quality Assurance Committee ensures engagement in governances processes. Involvement in corporate committees facilitates strategy and operational services planning |  |  | X |  | X | Informed culture, reporting culture, flexible culture, learning culture |
|  | Staff and Patient rounding (2017) | Leadership rounding on staff and patients to promote collegiality and real-time support for patients, families and staff. Rounding data reported quarterly to Board of Directors, new digital platform established to support patient rounding for unit-level leadership. | X | X | X | X |  | Informed culture, learning culture, flexible culture, reporting culture |
|  | Staff, physicians and volunteer engagement survey (2015) | Completed every two years. Provides direction for and action planning for the organization to continuously focus on engagement activities. |  | X | X | X |  | Informed culture, reporting culture, learning culture |
|  | Patient Engagement / Patient Family Advisors (2017) | Recruitment of corporate and program level patient and family advisors. Annual conference for all groups to share and disseminate quality improvement projects across the organization. | X | X | X | X |  | Informed culture, learning culture, flexible culture, reporting culture |
|  | Interprofessional and Cross-Functional System Reviews (2016) | Interdisciplinary meetings for major systems and safety error occurrences to identify root cause and action plans. Incidents tend involve multi-systems and multiple-services contributing to the incident. | X | X | X | X | X | Informed culture, flexible culture, reporting culture, learning culture |
|  | Pandemic Planning (2015) | Corporate committee that reviews organizational threats and state of preparedness for emergency codes and pandemic concerns/status. Regular emergency code and pandemic simulations lead by committee. | X | X | X | X |  | Flexible culture, learning culture |
|  | Incident Management System (IMS) COVID-19 LIVE (in March 2020, Code Grey in June 2021) (2020) | Incident Management System leadership table providing organizational direction through synthesizing data both internally and ministry of health and external tables (e.g. COVID Toronto Hot Table, TAHSN committees,). | X | X | X | X |  | Informed culture, reporting culture, just culture, learning culture |
|  | Comprehensive staffing plans (2020) | Pandemic/emergency plans outlining support and allocation of resources to all areas of the organization enabling leadership teams to follow and set standardized expectations in supporting decision making. | X | X |  | X |  | Flexible culture |
|  | Nursing Resource Teams / Forecasting Activities (2016) | A strategic workforce strategy to support, planning and training initiatives (hiring, ministry funded program utilization NGG, externs) to ensure robust staffing compliment to eliminate the need or dependance on external agencies for support. | X | X | X | X | X | Informed culture, flexible culture, reporting culture |
|  | Simulation/Escalation Training (2016) | Clinical simulation training across all programs within the organization to support simulated emergency preparedness and development/enhance skills of induvial practitioners and facilitate team responses to complex care events (code blue, MAID, trauma cases etc.). | X | X |  | X |  | Learning culture, flexible culture, informed culture |
|  | Human Factors Analysis (2017) | Ongoing QI and human factor engineering framework and engagement strategy with teams across the organization. Regular analysis and education support provided to all areas including monthly education provided internally. | X | X | X | X | X | Informed culture, learning culture, reporting culture |
|  | Integrated Risk Management (2018) | Ongoing centralized process of identifying enterprise risks from an organizational perspective taking into account internal and external factors. Risk mitigation strategies communicated broadly. | X | X |  | X | X | Reporting culture, informed culture, learning culture, flexible culture |
|  | Failure Mode Effect Analysis (2015) | In-depth analysis for Failure Mode Effect Analyses completed annually with respect to high risk or high priority areas. | X | X | X |  | X | Informed culture, reporting culture, learning culture |
|  | Debriefs for Patient safety incidents (e.g. codes, falls, violence, unexpected deaths, etc.) (2015) | Conduct full debriefs with clinicians directly involved in an incident and subject matter experts as needed. To identify contributing factors. Incidental findings, immediate risk mitigation action plans, and long-term recommendations to prevent recurrence. External supports also provided when required. |  | X | X | X | X | Informed culture, flexible culture, reporting culture, learning culture |
|  | System safety and quality priorities  (QIP) (2015) | Annual Hospital Patient Safety Plan which incorporates various quality and safety priorities set by the ministry and internal safety issues. Recent safety discussions also include a focus on access and flow, health equity. |  | X | X |  | X | Informed culture, learning culture, reporting culture |
|  | Monthly Accreditation tracers (2021) | Continuous audits of Required Organizational Practices and Standards conducted across the hospital and reported corporately and to a Corporate PFAC | X | X |  | X | X | Informed culture, reporting culture, learning culture |
|  | Flattened hierarchy (2015) | Supporting the ability for information to travel quickly between all levels of leadership and staff, especially with relevant details pertinent to quality and safety. | X |  | X |  | X | Flexible culture |
|  | President and Leadership Forums (2015) | Consistent and high level of communication to penetrate the organization regarding current safety scores, upcoming and developing issues including those specific to quality and safety | X | X |  | X | X | Informed culture, learning culture, flexible culture |
|  | Dedicated Clinical Practice Leader development (2016) | Dedicated monthly programs to provide education on a vast array of topics (e.g. human factors analysis, cognitive biases, teaching in clinical environment, etc.) | X | X | X | X | X | Informed culture, learning culture, flexible culture |
|  | IHI Poster Sessions (2016) | Organizational commitment to supporting change idea development, implementation, evaluation, ARECCI submission and IHI poster; teams of staff are sent to the national IHI forum to disseminate quality improvement culture |  | X | X |  | X | Informed culture, learning culture, reporting culture |
|  | Closed Loop Medication System (2015) | Single-dose closed loop medication system, which enables tracking of every single dose administered throughout the organization, including barcode scanning of patients and medications | X | X |  |  | X | Reporting culture, learning culture |
|  | Annual Pressure Injury Incidence Study (2015) | In preventing an identified Never Events, regular studies of hospital acquired pressure injuries supports identification of practice trends and opportunity to improve practice at the front-line. |  | X |  |  | X | Reporting culture, informed culture, learning culture, flexible culture |
|  | In-depth falls analysis (2017) | Completed by the Quality & Patient Safety Team, monthly in-depth analysis of patient falls includes root cause, location, patient factors |  | X |  |  | X | Informed culture, reporting culture, learning culture, flexible culture |
|  | Records of activity available for practice reviews (e.g., EMR and EMR modifications, hospital surveillance video, IV pump history, phone logs, medical alarm logs) (2015) | A number of digitally recorded systems provide respective information of activities, which are typically pulled for comprehensive case reviews or investigations. | X | X |  |  | X | Just culture, informed culture, reporting culture, learning culture, flexible culture |
|  | Just Culture (2015) | Implementation of a system of accountability proportionate to the culpability of individuals and systems | X |  | X |  | X | Just culture – to prevent arbitrary disciplinary decisions and appropriate consequences |
|  | Patient Leadership (2017) | Demonstrated patient experience leadership to advise on any potential and actual corporate issues from an advocacy perspective, demonstrating the value of their insights and leadership through Accreditation-related work and board quality report inputs/reviews/approvals | X | X | X | X | X | Informed culture, learning culture, reporting culture, flexible culture |
|  | Emergency Preparedness Drills (2015) | Practice of Code Red, Code Blue, Code Pink, Code Omega, Code Orange drills on-site | X | X | X | X | X | Learning culture, flexible culture |
|  | EMR Downtime Procedures (2015) | Every clinical unit houses a “downtime” box which contains paper forms and quick tip sheet guides in the event the EMR is unavailable. Backup plans are initiated in the event the downtime lasts longer than 24 hours. | X |  |  | X |  | Flexible culture |
|  | Cybersecurity Resilience (2021) | The organization implements a number of strategies to prevent and manage a cyberattack including firewalls, backup processes of accessing patient EMR, and measured plan to bring systems back online. | X | X | X | X | X | Learning culture, flexible culture |
|  | Program testing – privacy impact analysis, threat risk analysis, clinical risk analysis, penetration testing (2015) | Rigorous process for the testing of software, equipment and platforms that are requested to be integrated with the current digital and mechanical infrastructure of the hospital | X | X | X | X | X | Informed culture, reporting culture, flexible culture |
|  | Digital Interoperability Design (2015) | Intentional design of multiple hospital-based systems to facilitate timely communication (i.e. infections, falls, violence are simultaneously updated in the EMR, room side monitor, and status boards) | X |  | X | X |  | Learning culture, flexible culture, informed culture, reporting culture |
|  | Cardiac Arrest and Resuscitation Committee (2015) | Monthly review of all cardiac arrests and patient resuscitation, and process for flagging cases for expedited clinical reviews |  | X |  |  | X | Informed culture, reporting culture, learning culture, flexible culture |
|  | Patient Safety Plan (2016) | A detailed safety plan that is updated annually, highlighting safety initiatives from the point-of-care all the way to the Board of Directors, and ensure that all strategic planning and annual goals and objectives are purposefully planned to advance quality and safety at HRH | X | X | X | X | X | Informed culture, learning culture |
|  | Direct patient and family involvement in hospital research activities (2016) | Direct patient and family inclusion in research teams, developing research grants, manuscript submissions, and publications | X | X | X |  |  | Informed culture, reporting culture, learning culture, flexible culture |
|  | Maximizing student clinical placements (accommodating as possible) (2020) | Fostering a learning culture, creating a future pool of potential hires for managers to recruit from |  |  |  | X |  | Learning culture, flexible culture |
|  | Providing students thorough hospital orientation (2020) | Ensuring clinical placement students receive a similar orientation to staff acknowledging they are on a learning journey but also an essential fabric of the organization culture | X | X |  | X | X | Informed culture, learning culture, flexible culture, just culture |
|  | Rigorous benchmarking activities (2015) | Conducting annual benchmark exercises against regional, provincial and national performance indicators for numerous clinical indicators, and communicating results organization-wide | X | X |  | X | X | Informed culture, reporting culture, learning culture, flexible culture |
|  | Conducting deep dives and providing reports to the board members of the Quality Assurance Committee (2016) | Conducting and completing deep dive action plans, which frequently involve comparing peer hospitals, as well as identifying root causes of poor performance and reporting back on program and system-level improvements | X | X | X | X | X | Informed culture, reporting culture, learning culture, flexible culture |
|  | Culture of Patient Safety Survey Results and Action Plans (2015) | Patient Safety Culture Surveys are conducted every two years, with individual units and corporate action plans implemented and reported back to all departments and partners |  | X | X |  |  | Informed culture, reporting culture, learning culture, flexible culture |
|  | An adapted Quality & Safety Framework for HRH (2016) | Multiple safety theories and frameworks were embedded into the HRH Quality & Safety Framework including: Donabedian Framework for Measuring Safety, Hollnagel Safety I & Safety II Framework, Healthcare Excellence Canada Framework for Safety, Rasmussen Dynamic Model of Errors, High Reliability Organization Principles, Reason’s Safety Culture Framework, and Human Factors Science |  | X |  |  | X | Informed culture, Learning culture – multiple frameworks provide different insights that are explanatory and predictive in nature |
|  | Partnering with Toronto Academic Health Sciences Network, and an additional 30 academic institutions in services planning (2020) | Undertaking massive coordination to ensure smooth and comprehensive student and learning onboarding including surveying and reviewing of appropriate hard and soft clinical skills for better workforce integration (and patient care) | X | X |  | X | X | Informed culture, learning culture, reporting culture, flexible culture |
|  | Aligning patient satisfaction survey responses and patient relations complaints with identification of organizational patient safety risk concerns (2017) | Patient and family complaints provide insights, not only into the experience during their admission, but also to specific patient safety challenges they experienced | X | X | X | X | X | Informed culture, reporting culture, learning culture, flexible culture, just culture |
|  | Compliance with standards and practices as outlined by Accreditation Canada (2015) | Voluntary compliance with Require Organizational Practices/Required Safety Practices, and over 3,000 standards as described by Accreditation Canada | X | X |  |  |  | Informed culture, reporting culture |
|  | Policy & Procedure Manual (2015) | A comprehensive online manual of all hospital policies, protocols, procedures and guidelines which is readily available to all staff, students, leaders, volunteers and physicians |  | X | X | X | X | Informed culture, learning culture, just culture |
|  | Surgical Safety Checklist (2017) | A patient safety, effective communication and teamwork strategy, based on a three-phase safe surgery checklist used for every surgical intervention and procedure at HRH |  | X |  |  |  | Informed culture, reporting culture |
|  |  |  |  |  |  |  |  |  |

**Supplementary Table S2 – Document Review**

| Number (Refer to Table 2) | Initiative | HRH Documents Reviewed |
| --- | --- | --- |
| 1 | Command Centre – Generation 1 Tiles | Policy, procedure, training documents, reports |
| 2 | Command Centre – Generation 2 Tiles | Policy, procedure, training documents, reports |
| 3 | Leadership orientation | Orientation checklist |
| 4 | Daily safety huddle report to board | Policy, checklist, training documents, reports |
| 5 | Patient safety incident reporting | Policy, procedure, training documents, reports |
| 6 | Corporate Patient Safety Committee | Terms of reference, reports (x13) |
| 7 | Adverse Event Chart Reviews | Policy, procedure, training documents, report |
| 8 | Nursing staff competency testing | Orientation manual, training documents, report |
| 9 | Unit-based quality dashboards | Procedure, reports |
| 10 | RNAO Best Practice Spotlight Organization | Program policy, training documents, electronic medical record, reports |
| 11 | Reinventing Patient Care Councils | Policy, terms of reference, training documents, reports |
| 12 | Patient Family Advisor on board committee | Terms of reference, orientation manual, reports |
| 13 | Staff and patient rounding | Program policy, training documents, reports |
| 14 | Staff/physician/volunteer engagement survey | Legislation, procedure, training documents, reports |
| 15 | Patient family advisors | Terms of reference, program policy, training documents, reports |
| 16 | Interprofessional cross-functional system reviews | Procedure, training documents, reports |
| 17 | Pandemic planning | Policy, reports |
| 18 | Incident management system | Policy, procedure, training documents |
| 19 | Comprehensive staffing plans | Procedure |
| 20 | Nursing Resource Team / Staff forecasting | Procedure |
| 21 | Simulation/escalation training | Training documents |
| 22 | Human factors analysis | Procedure, training documents |
| 23 | Integrated risk management | Policy, procedure |
| 24 | Failure mode effect analysis | Policy, procedure, training documents |
| 25 | Post-incident debriefs | Policy, procedure documents |
| 26 | System safety and quality priority setting | Legislation, procedure documents |
| 27 | Monthly accreditation tracers | Procedure, training documents |
| 28 | Flattened hierarchy | Organizational chart |
| 29 | President’s and Leadership Forum | Procedure |
| 30 | Clinical practice leader development | Procedure, orientation manual |
| 31 | IHI poster development sessions | Procedure, training documents |
| 32 | Closed loop medication system | Policy, procedure, training documents |
| 33 | Annual pressure injury incidence study | Procedure, training documents |
| 34 | In-depth falls analysis | Procedure, reports |
| 35 | Records of clinical activity | Procedure, policies, reports |
| 36 | Just Culture | Policy, procedure |
| 37 | Patient engagement and patient leadership | Procedure, reports |
| 38 | Emergency preparedness drills | Policy, procedure, training documents |
| 39 | EMR downtime procedures | Policy, procedure, training documents |
| 40 | Cybersecurity resilience | Policy, procedure |
| 41 | New program testing | Policy, procedure, reports |
| 42 | Digital interoperability design | Policy |
| 43 | Cardiac arrest and resuscitation committee | Procedure, reports |
| 44 | Patient Safety Plan | Procedure, reports |
| 45 | Direct patient and family inclusion in hospital research | Procedure, reports |
| 46 | Maximizing student clinical placements | Procedure, reports |
| 47 | Comprehensive student orientation | Procedure, training documents |
| 48 | Benchmarking | Legislation, procedure, reports |
| 49 | Board-level deep dives | Procedure, reports |
| 50 | Culture of Patient Safety Survey | Legislation, surveys, procedures, reports |
| 51 | Quality & Safety Framework | Procedure, reports |
| 52 | Toronto Academic Health Sciences Network | Memorandum of Understanding, procedure, reports |
| 53 | Escalating patient concerns for risk management | Procedure, reports |
| 54 | Required Safety Practices (Accreditation Canada) | Policy, procedure, reports |
| 55 | Policy & Procedure Manual | Policy, procedures |
| 56 | Surgical Safety Checklist | Policy |

1. QRM system is the patient safety incident system used by HRH [↑](#footnote-ref-1)
